# Supplementary material for: Biomass-derived carbon nanostructures and their applications as electrocatalysts for hydrogen evolution and oxygen reduction/evolution
Source: Frontiers journal article supplement (doi:10.3389/fenve.2023.1228992), 2023-11-01
Supplement: Data_Sheet_1.DOCX [file Data_Sheet_1.DOCX]

**Biomass-derived carbon nanostructures and their applications as electrocatalysts for hydrogen evolution and oxygen reduction/evolution**

Kristina Mikhailovna Maliutina*a,b,c**, Joy Esohe Omoriyekomwan*d*, Chuanxin He*a,b*, Liangdong Fan*a,b*,* Andrea Follic*[[1]](#footnote-1)**

*a*Department of New Energy Science & Technology,College of Chemistry and Environmental Engineering, Shenzhen University, Shenzhen 518060, Guangdong, China.

*b*College of Physics and Optoelectronic Engineering, Key Lab of Optoelectronic Devices and Systems of Ministry of Education/Guangdong Province, Shenzhen University, Shenzhen 518060, Guangdong, China.

*c*School of Chemistry, Cardiff Catalysis Institute, Cardiff University, Main Building, Park Place, Cardiff, CF10 3AT UK

*d*Key Laboratory of Advanced Coal and Coking Technology of Liaoning Province, School of Chemical Engineering, University of Science and Technology Liaoning, Anshan 114051, China

**Number of figures: 2**

**Number of tables: 4**

# Recent insights on electrochemical mechanisms

## Fundamentals of water splitting process and hydrogen evolution reaction

Thus, the electrochemical water splitting process depends on the electrolytic medium resulting in the different half-cell reactions at the electrodes while the overall reaction is the same [1-3].

In an acidic electrolytic media:

At the cathode:

At the anode:

In an alkaline electrolytic media:

At the cathode:

At the anode:

Overall reaction:

Regardless of the electrolytes, the theoretical reaction potential difference of the process is 1.23 V at 298.15 K and atmospheric pressure. The cell potential of the cathode (Ec) and anode (Ea) is based on the normal hydrogen electrode (NHE). However, for practical application of the water-splitting process, an excess potential (overpotential, ηT) of the theoretical is required. The excess potential is primarily to overcome the inherent activation difficulties at the cathode (ηc), anode (ηa) and other associated hindrances (ηother) like contact resistance. Realistically, the overall water-splitting reaction is represented with an operational potential (EOP) defined by:

(6)

From this equation, it is paramount to decrease the overpotential (ηT) for the overall reaction to be energy-efficient and economical. Undeniably, the effective reduction of ηc and ηa can be achieved by the use of HER and OER catalysts, respectively, while optimizing the design of the electrolyzer is effective for minimizing ηother. Detailed discussion on overpotentials and measures for its reduction are described in the literature [4, 5]. To ensure the overall water splitting process is more economical, understanding fundamentals with recent theoretical insight and development of efficient hydrogen evolution reaction (HER) and oxygen evolution reaction (OER) electrocatalysts is essential. It should preferably be centred on sustainable, earth-abundant and less expensive materials, which can be achieved with biomass-derived carbon nanomaterials. Overall, HER involves a multi-step process with the transfer of two-electron via three probable reactions at the surface of the cathode under two different mechanisms (**Fig. S1** (a)) [6-8].

1. The first step is the *Volmer* or discharge reaction (Eq. 7, black arrows, **Fig. S1**a). Here, the first transferred electron is coupled to a proton from the hydronium cation (H3O+) to yield an adsorbed hydrogen intermediate (H*) on an active site. (* indicates the active site on the catalyst surface)
2. The second step is known as the *Heyrovsky* or ion+ reaction (Eq. 8, red arrows, **Fig. S1**a). It is an electrochemical desorption step for the formation of hydrogen molecules (H2). Here, the formation of H2 occurs via coupling of the second transferred electron to the adsorbed hydrogen atom and a proton from the solution.
3. The third step is *Tafel* or combination reaction (Eq. 9, green arrows, **Fig. S1**a). This is another possible pathway for H2 formation via a chemical desorption process. It involves the coupling of two adsorbed hydrogen atoms on the surface of the cathode to form H2.

However, in an alkaline medium, HER proceeds via [6]:

1. Rather than a discharge of proton from H3O+, a proton from water molecule (H2O) couples with the first transferred electron to yield the H* intermediate.
2. Subsequently, the H* intermediate combines with H2O and an electron to evolve H2.
3. Similar to the acidic conditions, two H* intermediates are chemically combined to produce H2 as sown in **Equation 9**.

Generally, HER in an alkaline medium is relatively slower than in the acidic condition, given the prior dissociation of H2O to yield the H* intermediates. Irrespective of the HER pathway, the formation of the H* intermediate is necessary. Therefore, the free energy of hydrogen adsorption (ΔGH*) is a universally established descriptor for hydrogen-evolving material [8, 9]. The ΔGH* value for an optimal HER catalyst is estimated to be close to zero. The reason being that a large ΔGH* suggests the breaking of the bond binding H* to the surface of the catalyst; hence, impeding H2 desorption. Moreover, a low ΔGH* value indicates a weak H* adsorption resulting in a poor interaction between the cathode catalyst and the protons.

Fig. S1. (a) Recent theoretical insight into HER mechanism (Yellow and blue balls represent e− and H+, respectively, while double blue balls represent H2 molecule). Reproduced with permission [7]. (b) Volcano plot for the acidic HER on metal electrodes. Reproduced with permission [10].

A volcano plot of computationally derived theoretical ΔGH* against the exchange current densities (log j0) reflects the HER activities for a range of catalysts (**Fig. S1**b) [10]. This plot proposed an intuitive approach to visualize and compare the activity of a range of catalysts to enable the optimization of material design for HER. Also, understanding the relative HER mechanism for each material is crucial to its design. The Tafel slope, derived from the Tafel plot and polarization curve, can be used to understand the HER mechanism [11, 12]. This slope is an inherent property of the catalyst, which is computed to define the rate-determining step of the HER process. In general, the Tafel slope is computed to be 29 mV dec−1, 39 mV dec−1 and 118 mV dec−1, for the Tafel, the Heyrovsky, and the Volmer processes, respectively. The rate-determining step of an electrode is defined by the proximity of its Tafel slope to that of the reactions mentioned above. However, it is a challenge to distinct if the rate-determining step is Tafel and Heyrovsky, given that the values of their Tafel slopes are similar. For instance, Zhao and co-workers reported that the Tafel slope of Pt electrode with Pt (110) plane is ∼30 mV dec−1; however, the rate-determining step could be either the Tafel or Heyrovsky reaction despite the value being close to that of Tafel reaction [13]. To distinct these reactions, the rate-determining steps (Tafel or Heyrovsky) should be related to the surface coverage of H* on the electrode [13, 14]. The determination and interpretation of the reaction mechanisms are significant to gain theoretical insight into the elementary steps involved in HER.

## Fundamentals of oxygen evolution reaction

As known, OER occurs at the anode as a multi-step process involving the transfer of four-electron. The mechanism and reaction routes for OER are relatively more intricate than those for HER owing to the slow electro-kinetic profile [10]. Similar to HER, OER differs depending on the medium. In an acidic medium, oxygen (O2) and hydrogen ion are formed from the oxidation of H2O, whereas, in an alkaline or neutral medium, H2O and O2 are formed from the oxidation of hydroxyl ion (OH-).

These reactions occur with the involvement of adsorbed OH-, O2- and OOH- intermediates on the surface of the catalyst. However, the sequence of their involvement varies with the type of catalyst system and the nature of the electrolyte. For instance, **Fig. S2**a illustrates the mechanistic OER pathway for a surface lattice hydroxide catalyst in an alkaline solution. Here, a four-step path is proposed. In step 1, OH- is adsorbed on the catalyst surface. Subsequently, H2O is formed via the interaction of the adsorbed OH- with another OH- from the alkaline solution (step 2). Simultaneously, an O2- species is formed at the active site. In step 3, a surface lattice O2- is transferred to the adsorbed OH− species to yield HOO− and creating an O-vacancy ([V]). Afterward, another OH− species interacts with [V] to generate O2 (step 4), with the assumption that [V] plays a crucial role in the reaction. In this case, step 4 was identified as the rate-determining step (indicated as L in **Fig. S2**a) [15].

Another plausible OER pathway was proposed for other catalyst systems such as perovskite oxides in alkaline solution is given in **Fig S2**b. Although similar to the above mechanism, the rate-determining step (RDS) is defined by step 2 (peroxide formation) and step 3 (proton extraction) [15]. Hypothetically, a more generally accepted OER mechanism is illustrated in **Fig. S2**c [16]. OER mechanism in an acidic medium is indicated with the blue line, while that for an alkaline medium is shown by the red line. Based on the hypothetically suggested models, the broadly accepted OER mechanisms are:

OER in an acidic medium:

OER in an alkaline medium

Recently, density functional theory (DFT) computation provided insight into the underlying mechanisms for each reaction step as follows [17]:

Where U represents the measured electrode potential (*vs* NHE at the standard condition), kB is the Boltzmann constant; and T is the absolute temperature. ΔG1, ΔG2, and ΔG3 (and ΔG4) refer to the adsorption energies of HO*, O* and HOO*, respectively. For an ideal case, ΔGHO*, ΔGO*, and ΔGHOO* are 1.23 eV, 2.46 eV and 3.69 eV, respectively [18].

Under standard conditions, when measured electrode potential is 0 versus the standard hydrogen electrode (SHE), the theoretical overpotential ηOER is defined as [4]:

where GOER is the largest Gibbs free energies of the reactions () [19].


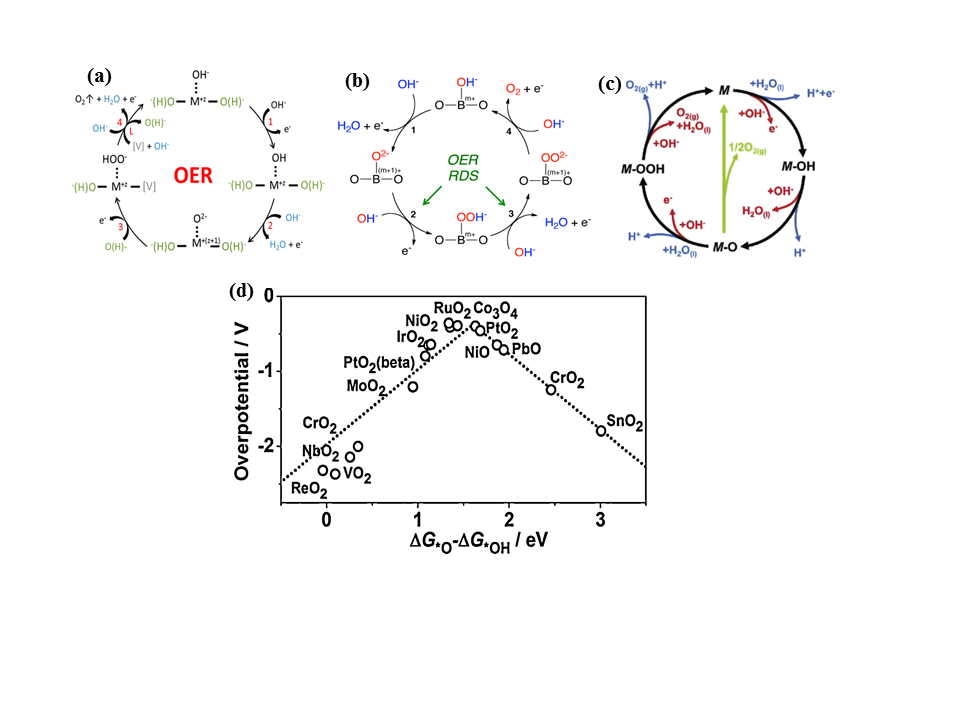


**Fig. S2.** Recent theoretical insight into OER mechanisms for (a) involving lattice hydroxide species (L = lattice hydroxide species rate-determining step), and (b) perovskite oxides in an alkaline solution (RDS = rate-determining step). Reproduced with permission [15]. (c) Hypothetically accepted OER mechanism in an acidic (blue line) and alkaline (red line) medium. Reproduced with permission [16]. (d) Volcano plot for OER on metal oxides. Reproduced with permission [20].

For minimal overpotential (ηOER = 0), ΔGOER is 1.23 eV. Given that ΔG1 = ΔG2 = ΔG3 = ΔG4 for an ideal OER catalyst at standard condition, this suggests that the ΔG for each step at ηOER = 0 1.23 eV [18]. Based on this hypothesis, a similar volcano plot to the HER catalysts is obtained for a range of OER catalysts (**Fig. S2**d). Here, the standard free energy (ΔG0O* - ΔG0HO*) is plotted against the theoretical overpotential to reflect the OER activities for a series of catalysts. ΔG0O* - ΔG0HO* is a notable descriptor for OER activity. Deductions from the volcano plot indicate that the plot can be beneficial towards the design and optimization of highly efficient OER catalysts. Moreover, the Tafel slope, which is also correlated with the OER overpotential, can direct the understanding of the OER mechanism by providing kinetic information of OER catalysts [21].

## Fundamentals of the oxygen reduction reaction

Oxygen reduction reaction (ORR) has been one of the most vibrant subjects of extensive research over the past century. This was driven by expanding importance of energy conversion/storage technologies in certain areas, such as fuel cells or metal-air batteries [22-24]. ORR is the major cathode process in fuel cells (PEMFC) devices [25]. Among the catalysts for ORR, platinum (Pt) uses as a standard and remains its leadership [26, 27], while oxides of iridium (Ir) and ruthenium (Ru) has been regarded as the benchmark electrocatalysts towards OER. The main barricade for Pt and other precious metals is their high costs for possible global commercialization of the fuel cell [25]. This has led to multiple research attempts to find alternative ORR electrocatalysts that can unreservedly replace Pt. The reduction of oxygen to water in an aqueous environment follows two different routes: a two-electron reduction pathway or a four-electron reduction pathway. The First-principles mechanism of ORR was proposed by Damjanovic et al. [28] and later improved [29, 30], making it easier to understand the complicated reaction process on the surface of the metal. It was proposed that ORR is carried out along two comparable parallel reactions, while for instance, in PEMFCs, a four-electron pathway is highly desired.

The ORR process is alkaline environment versus reversible hydrogen electrode (RHE) at 298.15 K, and its thermodynamic potentials at ambient conditions are presented as follows:

The pathway involving the hydrogen peroxide:

The ORR process is acidic environment versus reversible hydrogen electrode (RHE) at 298.15 K, and its thermodynamic potentials at ambient conditions involving an indirect reduction pathway:

Direct four-electron pathway reduction process:

It is desirable for the ORR to occur at potentials close to thermodynamic potentials as much as possible. For the thermodynamic potentials to be obtained, the rapid charge transfer kinetics of the ORR is mandatory. It has been reported that the kinetics of fuel cells at the cathode is slow, hence show overpotential ƞ as in Eq. (34):

Where *E* is the resultant potential, and *Eeq*is the equilibrium potential. The difference between *E* and *Eeq* is called polarisation and can occur at small currents (*ƞact*), large currents (*ƞconc)* and resulting as an ohmic drop (*iR*):

The relationship of overpotential, *ƞ*, and the net current is known as the *Butler-Volmer* equation and is given below:

Where *I* is the ORR current density, *io* is the exchange current density, *n* is the electrons transfer number, *β* is the transfer coefficient, ƞ is the overpotential of ORR, *F* is the Faraday constant, *R* is the gas constant and *T* is the temperature (in K).

The *Butler-Volmer* equation simplifies to *Tafel equation* at high overpotentials:

(37)

A plot of *ƞ* versus log*ic* also known as the Tafel plot and gives a linear relationship, with a slope of, known as the Tafel slope, which characterizes the mechanism and kinetics of the ORR. The higher the Tafel slope, the faster the overpotential increases with current density.

**Table S1.** Biomass classification and its source [31]

| source | The type of biomass | EXAMPLE |
| --- | --- | --- |
| Agricultural wastes | Dry Lignocellulosic agricultural reserves | Maize, rice, sugar, beet leaves cereal, Sugar, bulb sector residues |
| Livestock waste | Waste from cattle, pigs, and sheep |
| energy crops | Dry lignocellulosic woody energy crops | SRW-willow, SRC-poplar, Eucalyptus |
| Dry lignocellulosic herbaceous energy crops | Switchgrass, Common reed, Miscanthus, Reed canary grass, Indian shrub, Giant reed |
| Oil energy crops | Sugar millet, Sugar beet, Sweet sorghum, Cane beet |
| Starch energy crops | Wheat, Corncob, Potatoes, Barley, Maize |
| Others | Tobacco stems, Aquatic plants, Cotton stalks |
| Forestry | Forest by-products | Bark, Wood chips, Logs from thinning, Woodblocks |
| Industry | Wood industry residues | Wood chips, Industrial waste from sawmills and timber mills, Fibrous vegetable waste from sawmills, residues from the pulp industry |
| Industrial products and wastes | Pellets from sawdust and shavings, bio-oil, bio-diesel, Ethanol |
| gardens and parks | Herbaceous | Grass |
| Woody | Pruning |
| waste | Contaminated waste | Demolition wood, Biodegradable, MSW |
| Others | Roadside hay | Grass hay |
| Husks/shells/peels | Almond, Olive, Walnut, Palm pit, fruit peels |

**Table S2**. Summary of biomass-based carbon nanostructures recently obtained from different treatment methods.

| **Treatment method/condition** | **Pristine biomass** | **Obtained structures** | **Properties** | **Ref.** |
| --- | --- | --- | --- | --- |
| Hydrothermal carbonization at 250 ºC  Pyrolized at 1500 ºC | Coconut coir dust | Highly graphitic nanostructures | High degree of crystallinity | [32] |
| Cyclic Oxidation 600 ºC | Grass | Hollowed multiwalled CNTs | Diameters range of 10-30 and 30~50 nm | [33] |
| Microwave pyrolysis 600 ºC  Air oxidation 400 ºC | Pine nutshell | CNTs | Ordered CNTs, a diameter of ~85 nm | [34] |
| Cyclic Oxidation, 250 and 400 ºC | Wood fibers | Tubular CNTs | Inner diameter 4-5 nm & outer 10-20 nm | [35] |
| Catalytic graphitization 900-1200 ºC  Ni(NO3)2 and Fe(NO3)3 catalyst | Pinewood sawdust | Carbon nanoribbons,  nanocoils, and nanocapsules | High degree of crystallinity | [36] |
| Catalytic graphitization 100ºC, Fe(NO3)3 catalyst | Pine resin | Magnetic carbon nanocages | High crystallinity | [37] |
| Catalytic graphitization 800ºC, Fe(NO3)3 catalyst | Softwood sawdust | Bamboo-like & straight CNTs | High crystallinity | [38] |
| Catalytic graphitization  900ºC, Fe and Zn loaded catalyst | Coconut shell | Porous graphene nanosheets | Porous nanostructure | [39] |
| Thermo-chemical activation  (KOH solution) 1000 ºC | Elm  Samaras | Porous carbon nanosheets | Highly porous with 1-2mm thickness | [40] |
| Carbonization at 700 ºC, pyrolyzed at 600-900 ºC, Thermo-chemical activation (KOH solution) | Sugar cane bagasse | Porous carbon nanosheets | High SSA range of 1281-1874 m2·g-1 | [41] |
| Thermo-chemical activation (KOH solution) and pyrolyzed at 850 ºC | Willow catkin | Porous carbon nanosheets | Highly porous nanostructure | [42] |
| Combined KOH activation & hydrothermal treatment, Pyrolized at 800 ºC, Further 2600 ºC | Wheat straw | Highly graphitic carbon nanosheets | Highly graphitized with 2-10 atomic layers | [43] |
| Chemical pretreatment, fast microwave pyrolysis at 700 and carbonization at 900℃ | Pomelo peel | Mesoporous carbon nanosheets | SSA of 336.82 m2·g-1,Total pore volume 0.778 cm3g-1, abundant nitrogen-based active sites | [44] |
| Combined Chemical activation & graphitization treatment. First pyrolyzed with Ni at 600 ℃, further at 800 ℃ with KOH | Poplar catkin | Hollow carbon nanomesh | A large SSA of 1893 m2·g-1 and a high total pore volume (1.495 cm3g-1) | [45] |
| Chemical pretreatment (Alkali/Acid)  Microwave pyrolysis (600 ℃) | Palm Kernel Shell | CNTs | Ordered CNTs  Diameter range of 50-100 nm | [46] |
| Combustion method | Desmostachya bipinnata (grass) | CNTs, micro-rod, and nanofibers | Contained surface functional groups like –COOH & -OH | [47] |
| Hydrothermal carbonization pyrolysis at 800-1000 ºC, with KOH (activation via grinding) | Spruce bark | Vertically aligned graphene nanosheet arrays | Ultrahigh SSA (2385 m2·g-1) and volume of hierarchical pore volume | [48] |
| Carbonization at 950 ℃ & Mechanical treatment | Sphagnum moss and agricultural wastes | Nanocones, nanofibers, and CNTs | Diameter range of 10-70 nm. | [49, 50] |
| Combustion | Cinnamomum camphora | Graphitic carbon nanoparticles | Well refined structure | [47] |
| Chemical activation (KOH) & Combustion at 850 ℃ | Rice husk | Multilayer graphene structure | High-quality ordered graphene | [51] |

In O2-sat. 0.1 M KOH, otherwise specifically noted.

**Table S3.** Summary of the single-doped metal-free biochar-based nanomaterials as electrocatalyst for ORR/HER/OER

| **Pristine biomass** | **Obtained nanostructure** | **Approach** | **Synthesis method** | **Physical properties** | **Electrochemical properties** | **Active sites** | **Refs.** |
| --- | --- | --- | --- | --- | --- | --- | --- |
| *Ginkgo* leaves | Carbon nanosheets | ORR | Carbonization at 1100 °C in N2 for 5 h and NH3 post-treatment | Large SSA of 1436.02 m2 g−1 | 4e− pathway (n=3.7); *E*1/2 is -0.154 V (vs. Ag/AgCl) | Pyridinic and graphitic-N | Pan et al., (2014) [52] |
| Nori algae | Graphene-like nanosheets | ORR | Precarbonization at 400 °C for 1 h in Ar with melamine; Carbonization at 1000 °C in Ar for 1 h; Leaching with H2SO4 for 8h;  Graphitization at 1000 °C in Ar for 1 h; | SSA of 538 m2 g−1  *(ID/IG* = 1.65) due to the nitrogen doping | 4e− pathway (n=3.97) | Pyridinic and graphitic-N | Liu et al., (2014) [53] |
| *Typha Orientalis* plant | Carbon nanosheets | ORR | Hydrothermal treatment at 180 °C for 12 h;  Freeze-drying;  Annealing in NH3 at 800°C for 2h | SSA of 898 m2 g−1  A high content of N (9.1 at.%) | 4e− pathway (n=3.85-3.96) in both alkaline and acidic medium | Pyridinic- and pyrrolic-N | Chen et al., (2014) [54] |
| Peanut shell | Carbon nanosheets | HER | Pre-carbonization in N2 at 400 °C for 4 h;  KOH activation at 700 °C under N2 atmosphere for 2 h; Washing in 0.5M HCl | Ultra-large SSA of 2338 m2 g−1;  Structural defects *(ID/IG* = 0.99) | Overpotential of 400mV and Tafel slope of 75.7 mV dec-1 in 0.5 M H2SO4 | N-self doping;  active sites not determined | Saravananet al., (2015) [55] |
| Chitin | Carbon nanosheets | ORR & OER | Hydrothermal carbonization at 180 °C for 12h;  Carbonization at 750 °C for 2 h;  Activation with ZnCl2 at 750 °C for 2 h;  Leaching in HCl for 24 h at 80 °C | SSA of 300.7 m2 g−1 | ORR:4e− pathway (n= 3.87-3.99)  OER: Tafel slope of 90 mV dec-1; | Pyridinic and graphitic-N | Yuan et al., (2015) [56] |
| Pig blood protein | Carbon nanotubes | ORR | Commercial CNTs addition to biomass (1:1 ratio); pyrolysis at 800 °C in N2 for 2 h; | Structural defects *(ID/IG* = 0.756) due to the nitrogen doping | 4e− pathway (n=3.7);  *E*1/2 is 0.70V (vs. RHE) | Pyridinic- and pyrrolic-N | Zheng et al., (2015) [57] |
| Sludge flocs | Graphene foam and carbon nanosheets | ORR | Carbonization at 900 °C in N2 for 5 h;  HCl etching | SSA of 370 m2 g−1 | 4e− pathway (n=4) | High content of  graphitic-N | Ye et al., (2015) [58] |
| Gingko leaves | Fullerene-like carbon nanoshells | ORR | Pyrolysis at 800 °C in N2 | SSA of 583.1 m2 g−1 | 4e− pathway (n=4.1) | N-doped fullerene (C59N); Active sites not determined | Gao et al., (2015) [59] |
| Water hyacinth | Hierarchical carbon nanosheets | ORR | Carbonization at 700 °C in N2 for 2 h with ZnCl2;  Washing in HNO3 and HCl | SSA of 950.6 m2 g−1 | 4e− pathway (n=3.51–3.82);  Tafel slope of 103.4 mV dec-1 | Predominant graphitic and pyridinic and N; | Liu et al., (2015) [60] |
| Sweet osmanthus fruit | Carbon nanosheets and nanotubes | ORR | Pyrolysis with dicyandiamide and ferric sulfate as catalyst | SSA of 431.6 m2 g−1; | 4e− pathway (n=3.5) | Pyridinic- and pyrrolic-N | Liu et al., (2016) [61] |
| *Bombyx mori* silk | Thin graphene-like carbon nanosheets | HER | Activation with KCl and  carbonization at 900 °C in Ar for 4 h; | SSA of 349.3 m2 g−1;  Structural defects *(ID/IG* = 0.99) due to the KCl activation and N-rich sites | Tafel slope value of 131.6 mV dec−1;An overpotential *η10* of 137 mV *vs.* RHE in 0.5 M H2SO4 | Graphitic-N | Liu et al., (2016) [62] |
| Chitin | Carbon nanosheets/honeycomb-like 3D graphene | ORR | Freezing-thawing process of chitin and graphene oxide (GO) with NaOH and urea;  Freeze-drying;  Carbonization in Ar at 800 °C for 2h; | SSA of 116.95 m2 g−1;  uniform nanopores of about 2-4 nm; Structural defects *(ID/IG* = 1.02) due to the nitrogen doping | 4e− pathway  (n=3.65-3.87 | Pyridinic and graphitic N | Wang et al., (2016) [63] |
| Eggplant peel | Graphene nanosheets | ORR | Pyrolysis at 800 °C in Ar for 1 h; KOH activation for 24h; Washing in H2SO4 for 6 h; Carbonization at 1000 °C in Ar for 1.75 h and NH3 for 15 min | Thin mesoporous structure of the graphene (3–5 layers);  Large SSA of 1969 m2 g−1 | 4e− pathway (n=3.87);  Tafel slope of 60.3 mV dec-1 | Pyridinic and graphitic-N | Zhou et al., (2016) [64] |
| Pinecone | Carbon nanosheets | ORR | Pre-carbonization in Ar at 400 °C for 2h;  HCl washing;  Freeze-drying;  NH3 activation at 900 °C for 2 h | SSA of 1555.25 m2 g−1;  Structural defects *(ID/IG* = 0.856) due to the doping | 4e− pathway (n=4); | Pyridinic- and pyrrolic-N | Lei et al., (2017) [65] |
| Guanine and  fructose | Carbon nanosheets | ORR & HER | Hydrothermal carbonization at 180 °C for 8h; Carbonization at 1000 °C in N2 for 2 h | SSA of 974 m2 g−1;  Structural defects *(ID/IG* = 1.15) | ORR: 4e− pathway (n=3.92);*E*1/2 is 0.87 V HER: Tafel slope of 108 mV dec-1 in 1 M KOH; Potential of - 0.350 V at 10 mA cm-2 | Predominant graphitic and pyridinic-N | Huang et al., (2017) [66] |
| Fish scale | 3D-interconnected carbon nanosheets | ORR | Pre-carbonization in N2 at 350 °C for 5h;  Ball milling for 5h;  Pyrolysis at 900 °C in N2 for 2 h with ZnCl2 as an activator; | SSA of 850 m2 g−1; | 4e− pathway (n=3.3);  *E*1/2 is 0.85 V (vs. RHE) | Pyridinic and graphitic N; | Guo et al., (2017) [67] |
| Chitin | Carbon nanosheets with sponge-like 3D network | ORR & OER | Carbonization with g-C3N4 at 800 °C in Ar for 2 h; | SSA of 87.19 m2 g−1;  Structural defects *(ID/IG* = 0.95) due to the doping of nitrogen | ORR: 4e− pathway (n=3.73-3.95); Tafel slope of 76 mV dec-1;  OER: ΔE value is 0.90 V | Pyridinic-N | Wu et al., (2017) [68] |
| Water lettuce leaves | Carbon nanosheets | ORR | Carbonization in N2 at 500 °C for 2h; Annealing at 800 °C under NH3 atmosphere for 2 h; Washing with HCl for 15h | SSA of 842.33 m2 g−1;  Structural defects *(ID/IG* = 0.97) due to the doping of nitrogen | 4e− pathway (n=4.0); E1/2 is 0.79 V vs. RHE in 0.1 M PBS | Pyridinic and graphitic N; | Liu et al., (2018) [69] |
| *Euonymus japonicus* plant | Carbon nanosheets | ORR & OER | Carbonization at 900 °C in Ar for 2 h;  Washing in HNO3;  Annealing at 500 °C in Ar for 1 h; | Large SSA of 1793 m2 g−1;  Structural defects *(ID/IG* = 1.09) due to the doping of nitrogen | ORR: 4e− pathway (n=3.6);  OER: Tafel slope of 191 mV dec-1; | Pyridinic-N | Huang et al., (2018) [70] |
| Citric acid | Ultrathin carbon nanosheets | ORR, OER & HER | Carbonization with NH4 Cl at 1000 °C in Ar for 3 h; | Thin layers with 50–100 nm length with a thickness of ∼ 4–10 nm;  Large SSA of 1297 m2 g−1;  Structural defects *(ID/IG* = 1.03) | ORR: 4e− pathway (n=3.92);Tafel slope of 86 mV dec-1; *E*1/2 is 0.82;  OER: Ej=10 value is 1.64 V; Tafel slope of 142 mV dec-1;  HER: Tafel slope of 43 mV dec-1 in 0.5 M H2SO4; An overpotential *η10* of value is 90 mV *vs.* RHE; | Graphitic-N | Jiang et al., (2019) [71] |
| Palm waste | Hierarchical graphene-like carbon nanosheets | HER | Carbonization at 450 °C in N2 for 2 h;  Activation with KOH at 750 °C in N2 for 3 h;  Washing in 0.1M HCl | Large SSA of 1300.58 m2 g−1;  Structural defects *(ID/IG* = 0.91) | Tafel slope value of 63 mV dec−1;  An overpotential *η10* of 330 mV *vs.* RHE in 0.5 M H2SO4 | High nitrogen content (10.5%);pyridinic, pyrrolic, & pyridonic N | Prabu et al., (2019) [72] |
| Maize straw | Carbon nanosheets | ORR | Hydrothermal carbonization at 180 C for 12 h; doping with melamine; activation with FeCl3 and carbonization at 800 C for 2 h in N2; Washing in HCl | Large SSA of 1483 m2 g−1;  Structural defects *(ID/IG* = 0.78) due to the doping of N | Eonset= 0.985 V vs. RHE; E1/2= 0.89 V vs. RHE; 4e− pathway (n=3.90); jL= -5.80mA cm-2; Durability: 10000 s 83.7% of initial current; Zn-Air Battery: OCV: 1.451 V for 45 h; Pmax=127.9 mW cm−2 | N content of 4.70 %;  Pyrrolic-N | Hao and Chen et al., (2020) [73] |
| *Nori* algae | Carbon nanosheets | HER & ORR | Activation with ZnCl2 and carbonization at 800 °C in Arfor 4 h;  Washing with HCl for 3 h and in HNO3 for 20 min | Large SSA of 1300.58 m2 g−1;  Structural defects *(ID/IG* = 0.91) | ORR: 4e− pathway (n=3.88); *E*1/2 is 0.85 V (vs. RHE) in O2-sat. 1 M KOH;  HER: Tafel slope of 104.3 mV dec-1 in 0.5 M H2SO4; An overpotential *η10* of value is 218 mV *vs.* RHE; | Graphitic-N | Sun Y., (2021) [74] |

In O2-sat. 0.1 M KOH, otherwise specifically noted.

**Table S4.** Summary of the dual-doped metal-free biochar-based nanomaterials as electrocatalyst for ORR/HER/OER.

| **Pristine biomass** | **Obtained nanostructure** | **Approach** | **Synthesis method** | **Physical properties** | **Electrochemical properties** | **Active sites** | **Refs.** |
| --- | --- | --- | --- | --- | --- | --- | --- |
| Human hair | Carbon nanosheets | HER | Pre-carbonization in N2 at 400 °C for 4 h; ZnCl2 activation and carbonization at 800 °C under N2 atmosphere for 2 h; Washing in 2M HCl | SSA of 830 m2 g−1;  Structural defects *(ID/IG* = 1/07) due to the ZnCl2 activation and N, S-rich sites | Overpotential of -12mV; a current density of 10 mA cm−2 at −0.1 V; Tafel slope of 57.4 mV dec-1 in 0.5 M H2SO4 | N/S-self dual doping;  Graphitic-N | Liu et al., (2015) [75] |
| Keratin | Graphene-like nanobubbles and nanosheets | ORR | Precarbonization at 300 °C for 0.5 h in N2; Mix with KOH (ratio of 1:2) and pyrolysis at 600 °C for 2 h in N2; Washing in H2SO4 for 8 h; Graphitization at 1000 °C for 2h and in N2 and NH3 for 15 min | The diameter of nanobubbles is 15-100 nm; Large SSA of 1799 m2 g−1; *ID/IG* = 1.04 due to the doping | 4e− pathway (n=3.98);  *E*1/2 is 0.844 V  Tafel slope of 68 mV dec-1 | N/S-dual doping; pyridinic & graphitic N;  thiophene-S | Zhang et al., (2016) [76] |
| Chitosan | Carbon nanocages | ORR, HER & OER | Carbonization at 750 °C in Ar for 4 h; Washing with HNO3; Pyrolysis at 600 °C in Ar for 3 h | SSA of 796 m2 g−1; | ORR: 4e− pathway n=3.9; *E*1/2=0.835 V;Tafel slope of 65 mV dec-1; HER: Tafel slope of 82.1 mV dec-1; OER: E10=1.65 V; ΔE = 0.815 V | N/B-dual doping; pyridinic & pyrrolic-N;  B atom in the *meta* position | Lu W., (2017) [77] |
| Egg yolk | Multi-wrinkled graphene-like carbon nanosheets | ORR | Extraction of lecithin; Carbonization in Ar/H2 at 1000 °C for 2h with melamine | SSA of 447 m2 g−1;  Thickness of nanosheets ∼3 nm;  *ID/IG* = 1.01 | 4e− pathway (n=4);  *E*1/2 is 0.81 V; Tafel slope of 84 mV dec-1 | N/ P dual-doping; | Xian et al., (2019) [78] |
| Enteromorpha seaweed | 3D-interconnected mesoporous carbon nanosheets | ORR | Carbonization in Ar at 1000 °C for 3h; Washing in 5M HCl for 1 h | SSA of 778.2m2 g−1;  Nanosheets Thickness∼3 nm;  *ID/IG* = 1.006 | 4e− pathway (n=3.7-3.9); *E*1/2 is 0.79 V (vs. RHE) | N/S self-doping;  graphitic-N | Zhang et al., (2019) [79] |
| Mulberry leaves | Ladder-like 3D architecture | ORR | Activation with KOH and carbonization at 800 °C for 2 h in Ar; Acid washing with HCl for 24 h; Doping with thiourea and carbonization at 800 °C for 1 h in Ar | Ultralarge SSA of 1689 m2 g−1;  *ID/IG* = 1.02 | 4e− pathway (n=3.7-3.9); *E*onset is 0.86 V (vs. RHE) | N/ S-dual-doping; | He et al., (2019) [80] |
| *Allium cepa*  vegetable | Hierarchically porous carbon nanosheets | ORR | Soaking in KOH and thiourea for 12h; Pyrolysis in Ar at 1000 °C for 2h; Washing in HCl for 4 h | Large SSA of 1859.1 m2 g−1 | 4e− pathway (n=3.95); *E*1/2 is -0.15 V (V vs. Ag/AgCl); Tafel slope of 55 mV dec-1; | N/S dual-doping; graphitic & pyridinic N; thiophene-S | Zhang et al., (2020) [81] |

In O2-sat. 0.1 M KOH, otherwise specifically noted.

**Table S5.** Summary of the metal-doped biochar-based nanomaterials as electrocatalyst for ORR/HER/OER (in addition to Table 2).

| **Pristine biomass** | **Obtained nanostructure** | **Approach** | **Synthesis method** | **Physical properties** | **Electrochemical properties** | **Active sites** | **Refs.** |
| --- | --- | --- | --- | --- | --- | --- | --- |
| Catkins | Carbon nanotubes and hollow carbon fibers | ORR | Catkins melamine and FeCl3 dopants pyrolyzed at 800 °C for 2 h;  Leaching with H2SO4 for 12h; | SSA of 461.5 m2 g−1;  Defects *(ID/IG* = 1.65) with ordered CNTs | Eonset= -0.98 mV vs. Ag/AgCl;  E1/2= -194 mV vs. Ag/AgCl;  4e− pathway (n=3.94);  Tafel slope of 65.8 mV dec-1 | Metal-N (Fe-N);  pyridinic-N  and pyrrolic-N | Li et al., (2015)[82] |
| Seaweed (extracted sodium alginate) | 3D hierarchical carbon nanosheets and CNTs hybrid | ORR/OER | Preparation (Ni,Co)-alginate/CNT aerogels;  Carbonization at 700 °C in NH3 for 1 h;  Oxidation in air atmosphere at 300 °C for 5 h | SSA of 193 m2 g−1 | ORR: Eonset= 0.89 V vs. RHE;  E1/2= 0.74 V vs. RHE;  4e− pathway (n=3.8) ;  Tafel slope of 77 mV dec-1;  OER: Ej=10 = 1.60 V vs. RHE; | Ni/NiO/NiC2O4 NPs;  pyridinic-N  and pyrrolic-N | Ma. N, et al., (2016) [83] |
| Pomelo peel | Carbon nanosheets | ORR | Doping with K4Fe(CN)6 and Na2WO4;  Carbonization at 1000 °C for 1.5 h | SSA of 622.2 m2 g−1  Large structural defects  *(ID/IG* = 3.76) | 4e− pathway (n=3.95) in O2-sat. PBS;  Microbial fuel cell:  High power density of 1997±13 mW m-2;  (67.82% higher than Pt/C); | Fe3C;  W2C;  Fe–W and Fe–C moieties | Ma et al., (2016)[84] |
| Cotton wool | 3D fiber-supported nanosheets | HER | Carbonization of pretreated peanut shell at 800 °C for 2 h in N2;  Pyrolysis at 450 °C for 2 h in N2 to obtain MoSe2 nanosheets | Low SSA of 62 m2 g−1 | Eonset= -0.104 V *vs.* RHE;  An overpotential *η10* of 0.179 V *vs.* RHE  in 0.5 M H2SO4;  Tafel slope of 62 mV | MoSe2 | Zhang et al., (2016)[76] |
| Peanut shell | Hierarchical porous nanosheets | ORR/OER | Activation with KOH;  Doping with melamine;  Pyrolysis at 900 °C | Ultralarge SSA of 1864 m2 g−1 | ORR: Eonset= 0.98 V vs. RHE;  E1/2= 0.83 V vs. RHE;  4e− pathway (n=3.9);  in O2-sat. 0.1M KOH;  OER: Ej=10 = 1.61 V vs. RHE;  Tafel slope of 115 mV dec-1  92% retention of initial current after 10000 s;  Zn-Air Battery: large peak power density (80.8 mW/cm2 at 115 mA/cm2) | Metallic FeNi NPs;  Metal-N (Fe-Nx);  Predominant pyridinic-N (66%) | Yang et al., (2018)[85] |
| Silk fiber | Core-shell mushroom-like nanorods hybrid | OER/HER | Carbonization with Ni3Se4 and CoSe at 900°C in Ar for 3 h | The length and the diameter of the nanorod is about 500 nm and 100 nm, respectively | OER: Eonset= 1.90 V vs. RHE;  Low overpotential of Ej=10 = 215 mV;  Tafel slope of 75 mV dec-1 in 0.5M H2SO4;  HER: Eonset= -52 mV vs. RHE;  An overpotential *η10* of 89 mV *vs.* RHE  in 0.5 M H2SO4 | High content of Se (16.91 at%); | Li et al., (2018)[86] |
| Seaweed | 3D network contained core-shell and multiwalled carbon nanotubes | ORR/OER | Pyrolysis at 700 °C in Ar for 2 h | Structural defectsin graphitic structure *(ID/IG* = 0.69) due to the doping of N; | ORR: Eonset= 0.90 V vs. RHE;  E1/2= 0.79 V vs. RHE;  4e− pathway (n=3.93);  Tafel slope of 61.5 mV dec−1 in O2-sat. 0.1M KOH;  OER: Ej=10 = 1.59 V vs. RHE;  Zn-Air Battery: OCV 1.47 V;  a current density of 151.5 mA cm−2 at the voltage of 0.8 V; high peak power density of 156 mW cm−2;  the specific capacity is 775.4 mAh gZn−1 | Metal-N (Fe-N/Co-N);  graphitic and pyridinic-N;  FeCo*x* NPs; | Xiao et al., (2019)[87] |
| Peanut shell and Vitamin B12 | 3D hierarchical porous nanosheet network | ORR | Alkaline pretreatment of peanut shell with KOH for 12 h;  Carbonization of pretreated peanut shell at 800 °C for 1 h in N2;  Doping with Vitamin B12;  Carbonization of pretreated peanut shell at 800 °C for 1 h in N2 | SSA of 968 m2 g−1;  Structural defects *(ID/IG* = 1.12) due to the doping of N | ORR: Eonset= 0.868 V; E1/2= 0.80 V; jL= -6.16mA cm-2;4e− pathway (n=3.81); Tafel slope of 61.5 mV dec−; Stability for 15 000 s maintains 94.4 % of initial current;  Zn-Air Battery: OCV 1.44 V; a current density of 184 mA cm−2 at the voltage of 0.8 V; Pmax 159 mW cm−2 at 0.62 V | Metal-N (Co-N);  predominant pyridinic-N | Liu et al., (2019)[88] |
| Coffee waste grounds | Ultrathin carbon shells | ORR/HER | Doping of Fe(NO3)2;  Carbonization of the mixture at 800°C in Ar for 3 h | Structural defects *(ID/IG* = 0.99) due to the low temperature for graphitization | ORR: Eonset= 0.93 V vs. RHE;  Tafel slope value of 85 mV dec−1;  Maintain 90% of initial current after 20 000s in O2-sat. 0.5M NaOH.  HER: Tafel slope value of 59 mV dec−1;  Onset potential of 25 mV;  An overpotential *η10* of 75 mV *vs.* RHE in O2-sat. 0.5M H2SO4 | Metallic Fe NPs in core-shell that induce production of SO4*- | Ahsan et al., (2020)[89] |
| Egg White and yolk | Encapsulated nanoparticles Fe2P-Co2P/NCB-CNT composite | ORR | Graphic carbon nitride (g-C3N4), egg whites and yolks and 10mg of commercial CNTs were mixed and pre-carbonized at 350 °C for 2 h in N2 and carbonized at 900°C for 2 h in N2 | SSA of 405 m2 g−1;  Abundant structural defects (ID/IG = 6.66) | ORR: Eonset= 0.92 V vs. RHE;  E1/2= 0.85 V vs. RHE;  4e− pathway (n=3.93);  A current density of 4.82 mA cm−2 at the voltage of 0.4 V;  Tafel slope of 94.5 mV dec−1 in O2-sat. 0.1M KOH |  | Ma et al., (2022)[90] |

In O2-sat. 0.1 M KOH, otherwise specifically noted.

**References**

[1] Y. Ji, L. Yang, X. Ren, G. Cui, X. Xiong, X. Sun, Full Water Splitting Electrocatalyzed by NiWO4 Nanowire Array, ACS Sust. Chem. Eng., 6 (2018) 9555-9559.

[2] A.J. Martín, J. Pérez-Ramírez, Heading to Distributed Electrocatalytic Conversion of Small Abundant Molecules into Fuels, Chemicals, and Fertilizers, Joule, 3 (2019) 2602-2621.

[3] C. Tang, Q. Hu, F. Li, C. He, X. Chai, C. Zhu, J. Liu, Q. Zhang, B. Zhu, L. Fan, Coupled molybdenum carbide and nitride on carbon nanosheets: An efficient and durable hydrogen evolution electrocatalyst in both acid and alkaline media, Electrochim. Acta 280 (2018) 323-331.

[4] J. Wang, X. Yue, Y. Yang, S. Sirisomboonchai, P. Wang, X. Ma, A. Abudula, G. Guan, Earth-abundant transition-metal-based bifunctional catalysts for overall electrochemical water splitting: A review, J. Alloys Comp., 819 (2020) 153346.

[5] W. Li, Y. Yin, K. Xu, F. Li, K. Maliutina, Q. Wu, C. Li, B. Zhu, L. Fan, Enhancement of oxygen evolution activity of perovskite (La0.8Sr0.2)0.95MnO3-δ electrode by Co phase surface modification, Catal. Today 364 (2021) 148-156.

[6] X. Li, X. Hao, A. Abudula, G. Guan, Nanostructured catalysts for electrochemical water splitting: current state and prospects, J. Mater. Chem. A, 4 (2016) 11973-12000.

[7] C.G. Morales-Guio, L.-A. Stern, X. Hu, Nanostructured hydrotreating catalysts for electrochemical hydrogen evolution, Chem. Soc. Rev. , 43 (2014) 6555-6569.

[8] C. Tang, H. Zhang, K. Xu, Q. Zhang, J. Liu, C. He, L. Fan, T. Asefa, Unconventional molybdenum carbide phases with high electrocatalytic activity for hydrogen evolution reaction, J. Mater. Chem. A, 7 (2019) 18030-18038.

[9] X. Xu, H. Zhao, R. Wang, Z. Zhang, X. Dong, J. Pan, J. Hu, H. Zeng, Identification of few-layer ReS2 as photo-electro integrated catalyst for hydrogen evolution, Nano Energy, 48 (2018) 337-344.

[10] Y. Yan, B.Y. Xia, B. Zhao, X. Wang, A review on noble-metal-free bifunctional heterogeneous catalysts for overall electrochemical water splitting, J. Mater. Chem. A, 4 (2016) 17587-17603.

[11] S. Anantharaj, S.R. Ede, K. Sakthikumar, K. Karthick, S. Mishra, S. Kundu, Recent Trends and Perspectives in Electrochemical Water Splitting with an Emphasis on Sulfide, Selenide, and Phosphide Catalysts of Fe, Co, and Ni: A Review, ACS Catal., 6 (2016) 8069-8097.

[12] Y. Shi, B. Zhang, Recent advances in transition metal phosphide nanomaterials: synthesis and applications in hydrogen evolution reaction, Chem. Soc. Rev. , 45 (2016) 1529-1541.

[13] G. Zhao, K. Rui, S.X. Dou, W. Sun, Heterostructures for Electrochemical Hydrogen Evolution Reaction: A Review, Adv. Function. Mater., 28 (2018) 1803291.

[14] T. Shinagawa, A.T. Garcia-Esparza, K. Takanabe, Insight on Tafel slopes from a microkinetic analysis of aqueous electrocatalysis for energy conversion, Sci. Reports, 5 (2015) 13801.

[15] D. Chen, C. Chen, Z.M. Baiyee, Z. Shao, F. Ciucci, Nonstoichiometric Oxides as Low-Cost and Highly-Efficient Oxygen Reduction/Evolution Catalysts for Low-Temperature Electrochemical Devices, Chem. Rev. , 115 (2015) 9869-9921.

[16] N.-T. Suen, S.-F. Hung, Q. Quan, N. Zhang, Y.-J. Xu, H.M. Chen, Electrocatalysis for the oxygen evolution reaction: recent development and future perspectives, Chem. Soc. Rev. , 46 (2017) 337-365.

[17] J. Rossmeisl, Z.W. Qu, H. Zhu, G.J. Kroes, J.K. Nørskov, Electrolysis of water on oxide surfaces, J. Electroanal. Chem. , 607 (2007) 83-89.

[18] I.C. Man, H.-Y. Su, F. Calle-Vallejo, H.A. Hansen, J.I. Martínez, N.G. Inoglu, J. Kitchin, T.F. Jaramillo, J.K. Nørskov, J. Rossmeisl, Universality in Oxygen Evolution Electrocatalysis on Oxide Surfaces, ChemCatChem, 3 (2011) 1159-1165.

[19] R.L. Doyle, M.E.G. Lyons, The Oxygen Evolution Reaction: Mechanistic Concepts and Catalyst Design, in: S. Giménez, J. Bisquert (Eds.) Photoelectrochem. Solar Fuel Prod. Basic Princ. Adv. Devices, Springer International Publishing, Cham, 2016, pp. 41-104.

[20] J. Tymoczko, V. Colic, A. Ganassin, W. Schuhmann, A.S. Bandarenka, Influence of the alkali metal cations on the activity of Pt(111) towards model electrocatalytic reactions in acidic sulfuric media, Catal. Today, 244 (2015) 96-102.

[21] Y. Matsumoto, E. Sato, Electrocatalytic properties of transition metal oxides for oxygen evolution reaction, Mater. Chem. Phys., 14 (1986) 397-426.

[22] G.J.K. Acres, Recent advances in fuel cell technology and its applications, J. Power Sources, 100 (2001) 60-66.

[23] F.J. Li, Y. Yin, C. Zhang, W.J. Li, K. Maliutina, Q.L. Zhang, Q.X. Wu, C.X. He, Y. Zhang, M. Yang, L.D. Fan, Enhancing oxygen reduction performance of oxide-CNT through in-situ generated nanoalloy bridging, Appl. Catal. B, 263 (2020) 118297.

[24] K. Xu, H. Bao, C. Tang, K. Maliutina, F. Li, L. Fan, Engineering hierarchical MOFs-derived Fe–N–C nanostructure with improved oxygen reduction activity for zinc-air battery: the role of iron oxide, Mater. Today Energy, 18 (2020) 100500.

[25] L. Fan, B. Zhu, P.-C. Su, C. He, Nanomaterials and technologies for low temperature solid oxide fuel cells: Recent advances, challenges and opportunities, Nano Energy, 45 (2018) 148-176.

[26] K. Jiang, D. Zhao, S. Guo, X. Zhang, X. Zhu, J. Guo, G. Lu, X. Huang, Efficient oxygen reduction catalysis by subnanometer Pt alloy nanowires, Science Adv., 3 (2017) e1601705.

[27] F. Li, Y. Yin, W. Li, C. He, Q. Zhang, J. Liu, L. Fan, Readily fabricated NiCo alloy-metal oxide-carbon black hybrid catalysts for the oxygen reduction reactions in the alkaline media, Int. J. Hydrogen Energy 43 (2018) 12637-12645.

[28] A. Damjanovic, MA Genshaw and J. O'M. Bockris, J. Electroanal. Chem., 15 (1967) 173.

[29] A. Damjanovic, D. Sepa, M.J.E.A. Vojnovic, New evidence supports the proposed mechanism for O2 reduction at oxide free platinum electrodes, Electrochim. Acta, 24 (1979) 887-889.

[30] H.S. Wroblowa, G.J.J.o.E.C. Razumney, I. Electrochemistry, Electroreduction of oxygen: A new mechanistic criterion, J. Electroanal. Chem., 69 (1976) 195-201.

[31] J.S. Tumuluru, C. Wright, R. Boardman, N. Yancey, S. Sokhansanj, A review on biomass classification and composition, co-firing issues and pretreatment methods, Amer. Soc. Agricult. Biol. Eng. Ann. Int. Meet. 2011, ASABE 3(2011).

[32] G.B. Barin, I. de Fátima Gimenez, L.P. da Costa, A.G.S. Filho, L.S. Barreto, Influence of hydrothermal carbonization on formation of curved graphite structures obtained from a lignocellulosic precursor, Carbon, 78 (2014) 609-612.

[33] Z. Kang, E. Wang, B. Mao, Z. Su, L. Chen, L. Xu, Obtaining carbon nanotubes from grass, Nanotechnology, 16 (2005) 1192-1195.

[34] J. Zhang, A. Tahmasebi, J.E. Omoriyekomwan, J. Yu, Microwave-assisted synthesis of biochar-carbon-nanotube-NiO composite as high-performance anode materials for lithium-ion batteries, Fuel Process. Technol. , 213 (2021) 106714.

[35] B. Goodell, X. Xie, Y. Qian, G. Daniel, M. Peterson, J. Jellison, Carbon Nanotubes Produced from Natural Cellulosic Materials, J. Nanosci. Nanotechnol. , 8 (2008) 2472-2474.

[36] M. Sevilla, C. Sanchís, T. Valdés-Solís, E. Morallón, A.B. Fuertes, Synthesis of Graphitic Carbon Nanostructures from Sawdust and Their Application as Electrocatalyst Supports, J. Phys. Chem. C, 111 (2007) 9749-9756.

[37] E. Petala, Y. Georgiou, V. Kostas, K. Dimos, M.A. Karakassides, Y. Deligiannakis, C. Aparicio, J. Tuček, R. Zbořil, Magnetic Carbon Nanocages: An Advanced Architecture with Surface- and Morphology-Enhanced Removal Capacity for Arsenites, ACS Sustain. Chem. Eng., 5 (2017) 5782-5792.

[38] E. Thompson, A.E. Danks, L. Bourgeois, Z. Schnepp, Iron-catalyzed graphitization of biomass, Green Chem., 17 (2015) 551-556.

[39] L. Sun, C. Tian, M. Li, X. Meng, L. Wang, R. Wang, J. Yin, H. Fu, From coconut shell to porous graphene-like nanosheets for high-power supercapacitors, J. Mater. Chem. A, 1 (2013) 6462-6470.

[40] C. Chen, D. Yu, G. Zhao, B. Du, W. Tang, L. Sun, Y. Sun, F. Besenbacher, M. Yu, Three-dimensional scaffolding framework of porous carbon nanosheets derived from plant wastes for high-performance supercapacitors, Nano Energy, 27 (2016) 377-389.

[41] Q. Niu, K. Gao, Q. Tang, L. Wang, L. Han, H. Fang, Y. Zhang, S. Wang, L. Wang, Large-size graphene-like porous carbon nanosheets with controllable N-doped surface derived from sugarcane bagasse pith/chitosan for high performance supercapacitors, Carbon, 123 (2017) 290-298.

[42] Y. Li, G. Wang, T. Wei, Z. Fan, P. Yan, Nitrogen and sulfur co-doped porous carbon nanosheets derived from willow catkin for supercapacitors, Nano Energy, 19 (2016) 165-175.

[43] F. Chen, J. Yang, T. Bai, B. Long, X. Zhou, Facile synthesis of few-layer graphene from biomass waste and its application in lithium ion batteries, J. Electroanal. Chem., 768 (2016) 18-26.

[44] K. Maliutina, C. He, J. Huang, J. Yu, F. Li, C. He, L. Fan, Structural and electronic engineering of biomass-derived carbon nanosheet composite for electrochemical oxygen reduction, Sustainable Energy & Fuels, 5 (2021) 2114-2126.

[45] X.-L. Su, M.-Y. Cheng, L. Fu, J.-H. Yang, X.-C. Zheng, X.-X. Guan, Superior supercapacitive performance of hollow activated carbon nanomesh with hierarchical structure derived from poplar catkins, J. Power Sources, 362 (2017) 27-38.

[46] J.E. Omoriyekomwan, A. Tahmasebi, J. Zhang, J.L. Yu, Mechanistic study on direct synthesis of carbon nanotubes from cellulose by means of microwave pyrolysis, Energy Convers. Manage. , 192 (2019) 88-99.

[47] R.R. Gaddam, S. Kantheti, R. Narayan, K.V.S.N. Raju, Bulk synthesis of green carbon nanomaterials from Desmostachya bipinnata for the development of functional polyurethane hybrid coatings, Progress Org. Coat., 79 (2015) 37-42.

[48] Z. Sun, M. Zheng, H. Hu, H. Dong, Y. Liang, Y. Xiao, B. Lei, Y. Liu, From biomass wastes to vertically aligned graphene nanosheet arrays: A catalyst-free synthetic strategy towards high-quality graphene for electrochemical energy storage, Chem Eng. J., 336 (2018) 550-561.

[49] D.V. Onishchenko, V.P. Reva, V.V. Chakov, V.G. Kuryavyi, V.V. Petrov, Promising nanocomposite materials based on renewable plant resources, Metallurgist, 56 (2013) 679-683.

[50] D.V. Onishchenko, V.P. Reva, B.A. Voronov, Farm crop waste as a promising resource for forming carbon nanotubes, Rus. Agricult. Sci., 39 (2013) 540-543.

[51] H. Muramatsu, Y.A. Kim, K.-S. Yang, R. Cruz-Silva, I. Toda, T. Yamada, M. Terrones, M. Endo, T. Hayashi, H. Saitoh, Rice Husk-Derived Graphene with Nano-Sized Domains and Clean Edges, Small, 10 (2014) 2766-2770.

[52] F. Pan, Z. Cao, Q. Zhao, H. Liang, J. Zhang, Nitrogen-doped porous carbon nanosheets made from biomass as highly active electrocatalyst for oxygen reduction reaction, J. Power Sources 272 (2014) 8-15.

[53] F. Liu, H. Peng, C. You, Z. Fu, P. Huang, H. Song, S. Liao, High-Performance Doped Carbon Catalyst Derived from Nori Biomass with Melamine Promoter, Electrochim. Acta, 138 (2014) 353-359.

[54] P. Chen, L.-K. Wang, G. Wang, M.-R. Gao, J. Ge, W.-J. Yuan, Y.-H. Shen, A.-J. Xie, S.-H.J.E. Yu, E. Science, Nitrogen-doped nanoporous carbon nanosheets derived from plant biomass: an efficient catalyst for oxygen reduction reaction, Energy Environ. Sci., 7 (2014) 4095-4103.

[55] K.A. Saravanan, N. Prabu, M. Sasidharan, G.J.A.S.S. Maduraiveeran, Nitrogen-self doped activated carbon nanosheets derived from peanut shells for enhanced hydrogen evolution reaction, Appl. Surf. Sci., 489 (2019) 725-733.

[56] H. Yuan, L. Deng, X. Cai, S. Zhou, Y. Chen, Y. Yuan, Nitrogen-doped carbon sheets derived from chitin as non-metal bifunctional electrocatalysts for oxygen reduction and evolution, RSC Adv., 5 (2015) 56121-56129.

[57] J. Zheng, C. Guo, C. Chen, M. Fan, J. Gong, Y. Zhang, T. Zhao, Y. Sun, X. Xu, M. Li, R. Wang, Z. Luo, C. Chen, High content of pyridinic- and pyrrolic-nitrogen-modified carbon nanotubes derived from blood biomass for the electrocatalysis of oxygen reduction reaction in alkaline medium, Electrochim. Acta, 168 (2015) 386-393.

[58] D. Ye, L. Wang, R. Zhang, B. Liu, Y. Wang, J. Kong, Facile preparation of N-doped mesocellular graphene foam from sludge flocs for highly efficient oxygen reduction reaction, J. Mater. Chem. A, 3 (2015) 15171-15176.

[59] S. Gao, X. Wei, H. Fan, L. Li, K. Geng, J. Wang, Nitrogen-doped carbon shell structure derived from natural leaves as a potential catalyst for oxygen reduction reaction, Nano Energy, 13 (2015) 518-526.

[60] X. Liu, Y. Zhou, W. Zhou, L. Li, S. Huang, S. Chen, Biomass-derived nitrogen self-doped porous carbon as effective metal-free catalysts for oxygen reduction reaction, Nanoscale, 7 (2015) 6136-6142.

[61] Z. Liu, F. Wang, M. Li, Z.-H. Ni, N, S and P-ternary doped carbon nano-pore/tube composites derived from natural chemicals in waste sweet osmanthus fruit with superior activity for oxygen reduction in acidic and alkaline media, RSC Adv., 6 (2016) 37500-37505.

[62] X. Liu, M. Zhang, D. Yu, T. Li, M. Wan, H. Zhu, M. Du, J. Yao, Functional materials from nature: honeycomb-like carbon nanosheets derived from silk cocoon as excellent electrocatalysts for hydrogen evolution reaction, Electrochim. Acta, 215 (2016) 223-230.

[63] B. Wang, S. Li, X. Wu, J. Liu, J. Chen, Biomass chitin-derived honeycomb-like nitrogen-doped carbon/graphene nanosheet networks for applications in efficient oxygen reduction and robust lithium storage, J. Mater. Chem. A, 4 (2016) 11789-11799.

[64] H. Zhou, J. Zhang, J. Zhu, Z. Liu, C. Zhang, S. Mu, A self-template and KOH activation co-coupling strategy to synthesize ultrahigh surface area nitrogen-doped porous graphene for oxygen reduction, RSC Adv., 6 (2016) 73292-73300.

[65] X. Lei, M. Wang, Y. Lai, L. Hu, H. Wang, Z. Fang, J. Li, J. Fang, Nitrogen-doped micropore-dominant carbon derived from waste pine cone as a promising metal-free electrocatalyst for aqueous zinc/air batteries, J. Power Sources, 365 (2017) 76-82.

[66] B. Huang, Y. Liu, Z. Xie, Biomass derived 2D carbons via a hydrothermal carbonization method as efficient bifunctional ORR/HER electrocatalysts, J. Mater. Chem. A, 5 (2017) 23481-23488.

[67] C. Guo, R. Hu, W. Liao, Z. Li, L. Sun, D. Shi, Y. Li, C. Chen, Protein-enriched fish “biowaste” converted to three-dimensional porous carbon nano-network for advanced oxygen reduction electrocatalysis, Electrochim. Acta, 236 (2017) 228-238.

[68] X. Wu, S. Li, B. Wang, J. Liu, M. Yu, From biomass chitin to mesoporous nanosheets assembled loofa sponge-like N-doped carbon/g-C3N4 3D network architectures as ultralow-cost bifunctional oxygen catalysts, Micropor. Mesopor. Mater., 240 (2017) 216-226.

[69] L. Liu, G. Zeng, J. Chen, L. Bi, L. Dai, Z. Wen, N-doped porous carbon nanosheets as pH-universal ORR electrocatalyst in various fuel cell devices, Nano Energy, 49 (2018) 393-402.

[70] Y. Huang, D. Wu, D. Cao, D. Cheng, Facile preparation of biomass-derived bifunctional electrocatalysts for oxygen reduction and evolution reactions, Int. J. Hydr. Energy, 43 (2018) 8611-8622.

[71] H. Jiang, J.X. Gu, X.S. Zheng, M. Liu, X.Q. Qiu, L.B. Wang, W.Z. Li, Z.F. Chen, X.B. Ji, J. Li, Defect-rich and ultrathin N doped carbon nanosheets as advanced trifunctional metal-free electrocatalysts for the ORR, OER and HER, Energy Environ. Sci. , 12 (2019) 322-333.

[72] N. Prabu, R.S.A. Saravanan, T. Kesavan, G. Maduraiveeran, M.J.C. Sasidharan, An efficient palm waste derived hierarchical porous carbon for electrocatalytic hydrogen evolution reaction, Carbon, 152 (2019) 188-197.

[73] X. Hao, W. Chen, Z. Jiang, X. Tian, X. Hao, T. Maiyalagan, Z.-J. Jiang, Conversion of maize straw into nitrogen-doped porous graphitized carbon with ultra-high surface area as excellent oxygen reduction electrocatalyst for flexible zinc–air batteries, Electrochim. Acta, 362 (2020) 137143.

[74] Y. Sun, Y. Ouyang, J. Luo, H. Cao, X. Li, J. Ma, J. Liu, Y. Wang, L. Lu, Biomass-derived nitrogen self-doped porous activation carbon as an effective bifunctional electrocatalysts, Chinese Chem. Let., 32 (2021) 92-98.

[75] X. Liu, W. Zhou, L. Yang, L. Li, Z. Zhang, Y. Ke, S. Chen, Nitrogen and sulfur co-doped porous carbon derived from human hair as highly efficient metal-free electrocatalysts for hydrogen evolution reactions, J. Mater. Chem. A, 3 (2015) 8840-8846.

[76] Y. Zhang, L. Zuo, L. Zhang, Y. Huang, H. Lu, W. Fan, T. Liu, Cotton Wool Derived Carbon Fiber Aerogel Supported Few-Layered MoSe2 Nanosheets As Efficient Electrocatalysts for Hydrogen Evolution, ACS Appl. Mater. Interfaces, 8 (2016) 7077-7085.

[77] Z. Lu, J. Wang, S. Huang, Y. Hou, Y. Li, Y. Zhao, S. Mu, J. Zhang, Y. Zhao, N,B-codoped defect-rich graphitic carbon nanocages as high performance multifunctional electrocatalysts, Nano Energy, 42 (2017) 334-340.

[78] F. Xian, L. Gao, Z. Zhang, H. Zhang, S. Dong, G. Cui, N, P dual-doped multi-wrinkled nanosheets prepared from the egg crude lecithin as the efficient metal-free electrocatalyst for oxygen reduction reaction, Appl. Surf. Sci., 476 (2019) 76-83.

[79] X. Zhang, Y. Wang, Y. Du, M. Qing, F. Yu, Z.Q. Tian, P.K. Shen, Highly active N,S co-doped hierarchical porous carbon nanospheres from green and template-free method for super capacitors and oxygen reduction reaction, Electrochim. Acta 318 (2019) 272-280.

[80] D. He, W. Zhao, P. Li, S. Sun, Q. Tan, K. Han, L. Liu, L. Liu, X. Qu, Bifunctional biomass-derived N, S dual-doped ladder-like porous carbon for supercapacitor and oxygen reduction reaction, J. Alloys Comp., 773 (2019) 11-20.

[81] J. Zhang, J. He, H. Zheng, R. Li, X. Gou, N,S dual-doped carbon nanosheet networks with hierarchical porosity derived from biomass of Allium cepa as efficient catalysts for oxygen reduction and Zn–air batteries, J. Mater. Sci., 55 (2020) 7464-7476.

[82] M. Li, Y. Xiong, X. Liu, C. Han, Y. Zhang, X. Bo, L. Guo, Iron and nitrogen co-doped carbon nanotube@hollow carbon fibers derived from plant biomass as efficient catalysts for the oxygen reduction reaction, J. Mater. Chem. A, 3 (2015) 9658-9667.

[83] N. Ma, Y. Jia, X. Yang, X. She, L. Zhang, Z. Peng, X. Yao, D. Yang, Seaweed biomass derived (Ni,Co)/CNT nanoaerogels: efficient bifunctional electrocatalysts for oxygen evolution and reduction reactions, J. Mater. Chem. A, 4 (2016) 6376-6384.

[84] M. Ma, S. You, W. Wang, G. Liu, D. Qi, X. Chen, J. Qu, N. Ren, Biomass-Derived Porous Fe3C/Tungsten Carbide/Graphitic Carbon Nanocomposite for Efficient Electrocatalysis of Oxygen Reduction, ACS Appl. Mater. Interfaces, 8 (2016) 32307-32316.

[85] C. Yang, H. Jin, C. Cui, J. Li, J. Wang, K. Amine, J. Lu, S. Wang, Nitrogen and sulfur co-doped porous carbon sheets for energy storage and pH-universal oxygen reduction reaction, Nano Energy, 54 (2018) 192-199.

[86] J. Li, M. Wan, T. Li, H. Zhu, Z. Zhao, Z. Wang, W. Wu, M. Du, NiCoSe2-x/N-doped C mushroom-like core/shell nanorods on N-doped carbon fiber for efficiently electrocatalyzed overall water splitting, Electrochim. Acta, 272 (2018) 161-168.

[87] X. Xiao, X. Li, G. Yu, J. Wang, G. Yan, Z. Wang, H. Guo, FeCox alloy nanoparticles encapsulated in three-dimensionally N-doped porous carbon/multiwalled carbon nanotubes composites as bifunctional electrocatalyst for zinc-air battery, J. Power Sources, 438 (2019) 227019.

[88] Z. Liu, Z. Li, S. Tian, M. Wang, H. Sun, S. Liang, Z. Chang, G. Lu, Conversion of peanut biomass into electrocatalysts with vitamin B12 for oxygen reduction reaction in Zn-air battery, Int. J. Hydr. Energy, 44 (2019) 11788-11796.

[89] M.A. Ahsan, A.R. Puente Santiago, A. Rodriguez, V. Maturano-Rojas, B. Alvarado-Tenorio, R. Bernal, J.C. Noveron, Biomass-derived ultrathin carbon-shell coated iron nanoparticles as high-performance tri-functional HER, ORR and Fenton-like catalysts, J. Clean. Prod., 275 (2020) 124141.

[90] J. Ma, A. Sun, Y. Liu, T.K.A. Hoang, L. Yang, Encapsulation of Fe2P-Co2P nanoparticles in N-doped biomass-based carbon and carbon nanotube composite as an efficient oxygen reduction electrocatalyst, Electrochim. Acta, 427 (2022) 140893.

1. * Correponding authors: Prof. Dr. Liangdong Fan, Email address: [fanld@szu.edu.cn](mailto:fanld@szu.edu.cn)

   Dr. Kristina Maliutina, Email address: [maliutinak@cardiff.ac.uk](mailto:maliutinak@cardiff.ac.uk)

   Dr. Andrea Folli, Email address: [follia@cardiff.ac.uk](mailto:follia@cardiff.ac.uk) [↑](#footnote-ref-1)
